# Supplementary material for: Polypyrrole-Coated Low-Crystallinity Iron Oxide Grown on Carbon Cloth Enabling Enhanced Electrochemical Supercapacitor Performance
Source: MDPI journal article supplement (doi:10.3390/molecules28010434), 2023-01-03
Supplement: s1 [file s1]

## Supporting Information

### Polypyrrole-coated low-crystallinity iron oxide grown on carbon cloth enabling enhanced electrochemical supercapacitor performance

Chunhui Wu, Zifan Pei, Menglin Lv, Duchan Huang, Yuan Wang,\* Shaojun Yuan\*

Low-carbon Technology & Chemical Reaction Engineering Lab, College of Chemical Engineering, Sichuan University, Chengdu 610065, China.

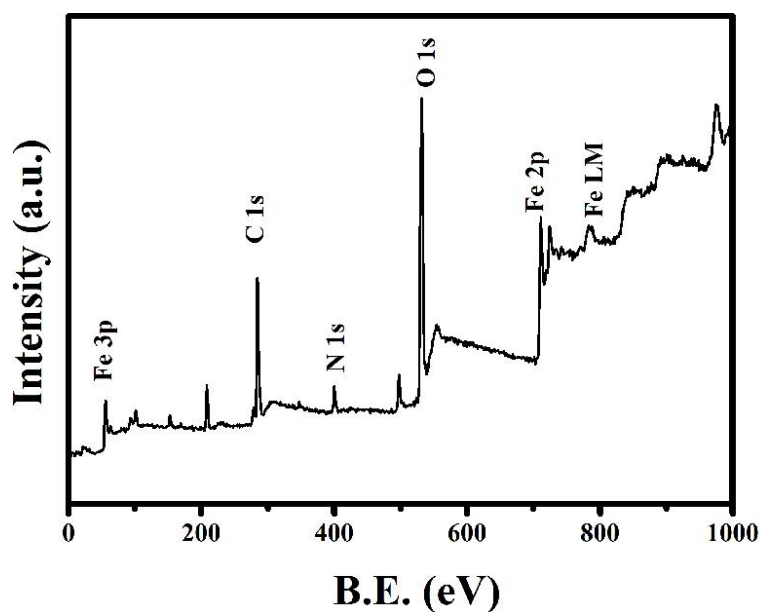

**Figure S1.** Wide scan XPS spectrum of D-Fe<sub>2</sub>O<sub>3</sub>@PPy/CC electrode.

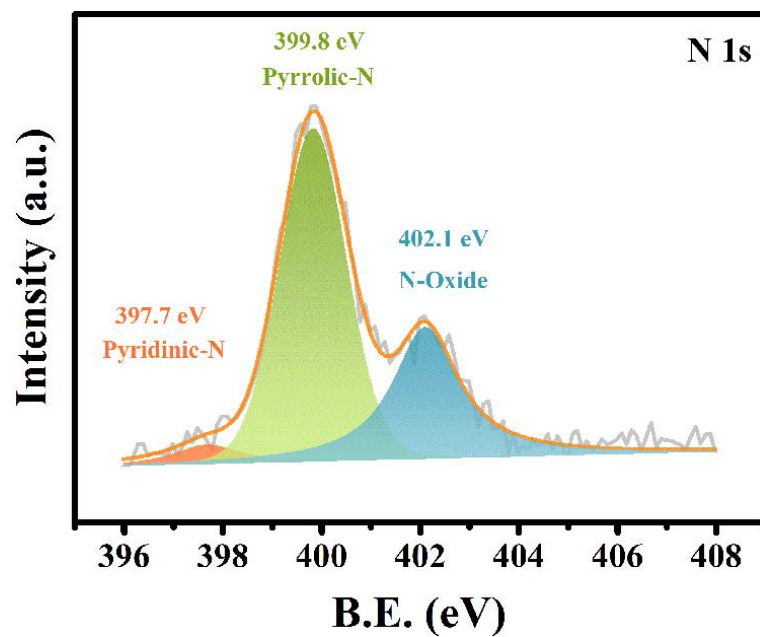

**Figure S2.** N 1s XPS spectrum of D-Fe<sub>2</sub>O<sub>3</sub>@PPy/CC electrode.

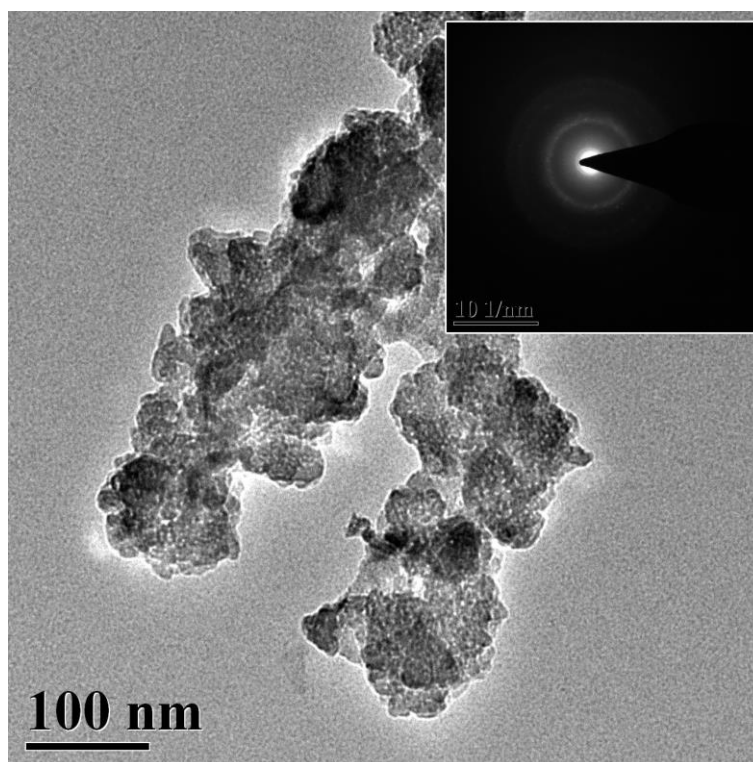

**Figure S3.** The TEM image of D-Fe<sub>2</sub>O<sub>3</sub>@PPy and the related SAED pattern.

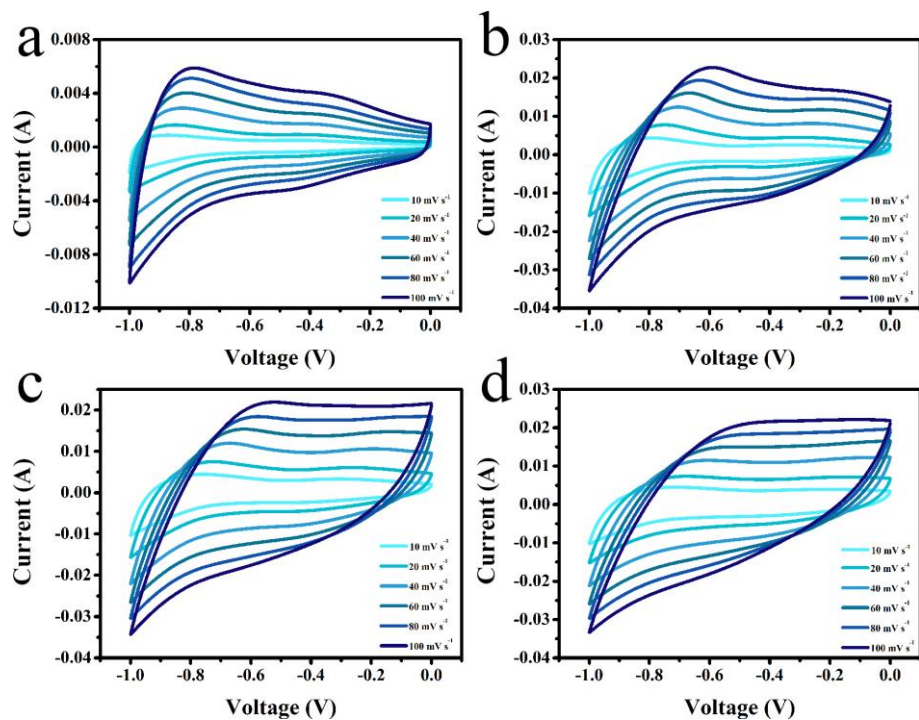

**Figure S4.** CV curves of D-Fe<sub>2</sub>O<sub>3</sub>/CC electrodes. (a) pristine Fe<sub>2</sub>O<sub>3</sub>, (b) D- Fe<sub>2</sub>O<sub>3</sub>-0.5h, (c) D- Fe<sub>2</sub>O<sub>3</sub>-1h, and (d) D- Fe<sub>2</sub>O<sub>3</sub>-4h.

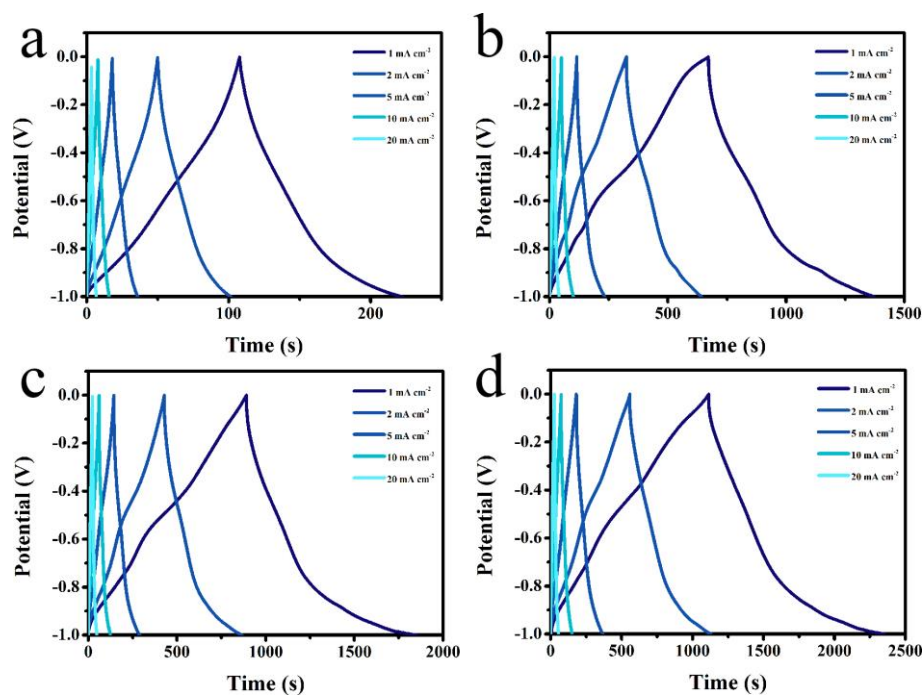

**Figure S5.** GCD curves of D-Fe<sub>2</sub>O<sub>3</sub>/CC electrodes. (a) pristine Fe<sub>2</sub>O<sub>3</sub>, (b) D- Fe<sub>2</sub>O<sub>3</sub>-0.5h, (c) D- Fe<sub>2</sub>O<sub>3</sub>-1h, and (d) D- Fe<sub>2</sub>O<sub>3</sub>-4h.

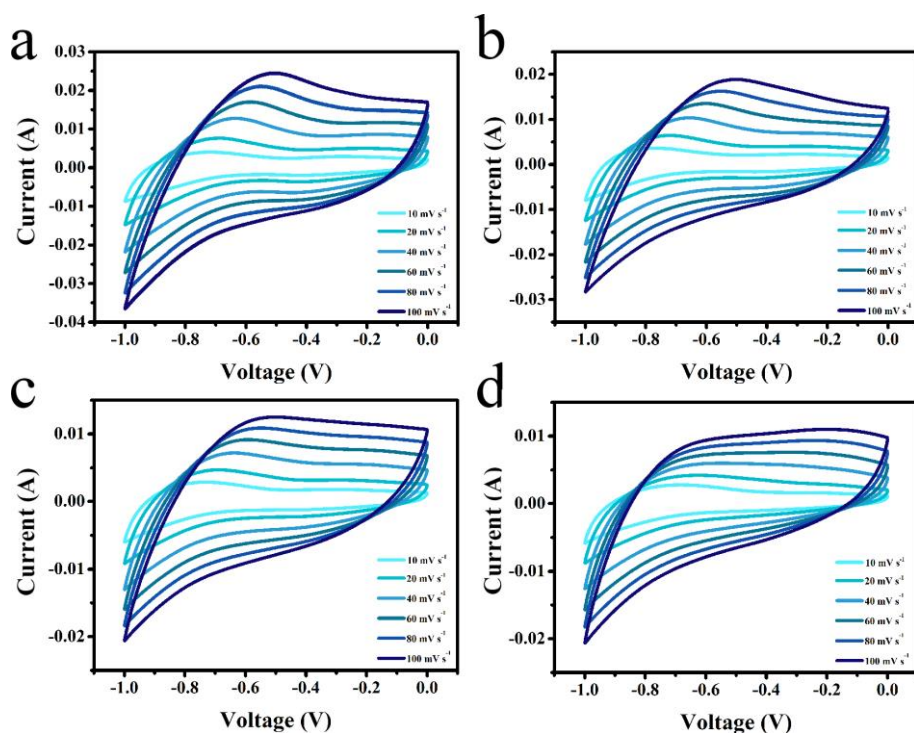

**Figure S6.** CV curves of D-Fe<sub>2</sub>O<sub>3</sub>@PPy/CC electrodes. (a) D-Fe<sub>2</sub>O<sub>3</sub>@PPy-30s, (b) D-Fe<sub>2</sub>O<sub>3</sub>@PPy-60s, (c) D-Fe<sub>2</sub>O<sub>3</sub>@PPy-120s, and (d) D-Fe<sub>2</sub>O<sub>3</sub>@PPy-180s.

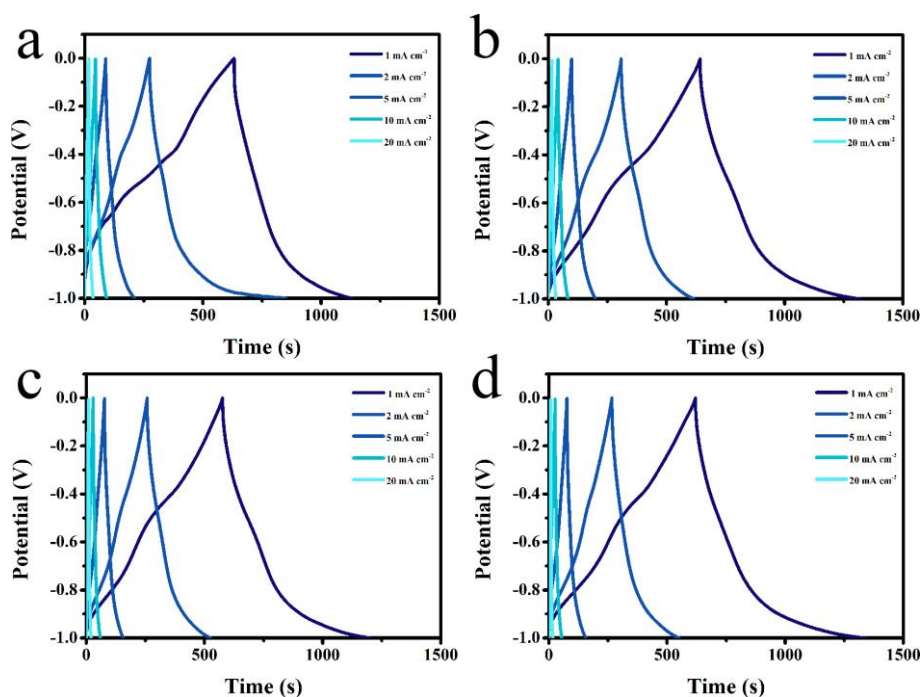

**Figure S7.** GCD curves of D-Fe<sub>2</sub>O<sub>3</sub>@PPy/CC electrodes. (a) D-Fe<sub>2</sub>O<sub>3</sub>@PPy-30s, (b) D-Fe<sub>2</sub>O<sub>3</sub>@PPy-60s, (c) D-Fe<sub>2</sub>O<sub>3</sub>@PPy-120s, and (d) D-Fe<sub>2</sub>O<sub>3</sub>@PPy-180s.

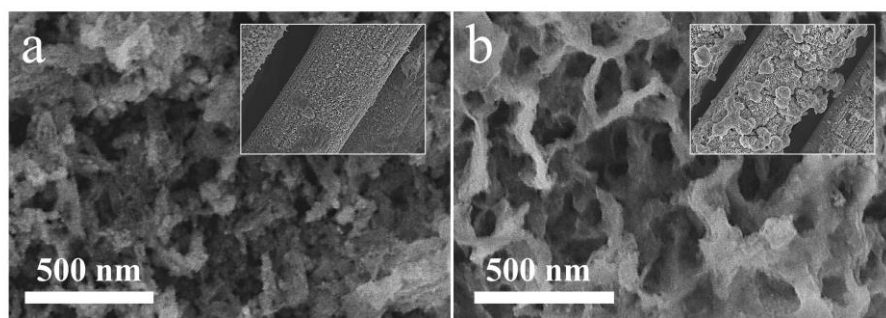

**Figure S8.** SEM images of (a) Fe<sub>2</sub>O<sub>3</sub>/CC and (b) D-Fe<sub>2</sub>O<sub>3</sub>@PPy/CC electrode after long cycling test.

**Table S1.** Electrochemical performance of Fe<sub>2</sub>O<sub>3</sub>-based and D-Fe<sub>2</sub>O<sub>3</sub>@PPy/CC anodes for supercapacitors.

| Electrodes                                                 | Electrolyte                             | Potential (V) | Specific capacitance<br>Rate capability                                                                   | Ref.                                                            |
|------------------------------------------------------------|-----------------------------------------|---------------|-----------------------------------------------------------------------------------------------------------|-----------------------------------------------------------------|
| <b>D-Fe<sub>2</sub>O<sub>3</sub>@PPy/CC</b>                | <b>1 M Na<sub>2</sub>SO<sub>4</sub></b> | <b>-1-0</b>   | <b>615 mF cm<sup>-2</sup> at 1 mA cm<sup>-2</sup><br/>208 mF cm<sup>-2</sup> at 20 mA cm<sup>-2</sup></b> | <b>This work</b>                                                |
| <b>FeO-CNT-20/CC</b>                                       | 1 M Na <sub>2</sub> SO <sub>4</sub>     | -1-0          | 483.4 mF cm <sup>-2</sup> at 1 mA cm <sup>-2</sup>                                                        | <i>ACS Appl. Mater. Interfaces</i> <b>2021</b> , 13, 45670.     |
| <b>Fe<sub>2</sub>O<sub>3</sub><br/>NTRs@PPy/CC</b>         | 1 M Na <sub>2</sub> SO <sub>4</sub>     | -1-0          | 237 mF cm <sup>-2</sup> at 1 mA cm <sup>-2</sup><br>102 mF cm <sup>-2</sup> at 20 mA cm <sup>-2</sup>     | <i>Electrochimica Acta</i> <b>2021</b> , 386, 138486            |
| <b>CC/Fe<sub>2</sub>O<sub>3</sub>@b-<br/>C/CC</b>          | 6 M KOH                                 | -1.2-0        | 246.2 mC cm <sup>-2</sup> at 5 mV s <sup>-1</sup>                                                         | <i>J. Power Sources</i> <b>2021</b> , 489, 229501               |
| <b>Fe<sub>2</sub>O<sub>3</sub>@N-C/CC</b>                  | 4 M KOH                                 | -1.0-0        | 183.3 mF cm <sup>-2</sup> at 3 mA cm <sup>-2</sup>                                                        | <i>ACS Appl. Energy Mater.</i> <b>2020</b> , 3, 12162–12171     |
| <b>Fe<sub>2</sub>O<sub>3-δ</sub> nanorod<br/>arrays/CC</b> | 1 M LiOH                                | -0.9-0        | 350 mF cm <sup>-2</sup> at 1 mA cm <sup>-2</sup>                                                          | <i>Nano Energy</i> <b>2018</b> , 45, 390–397                    |
| <b>Fe<sub>2</sub>O<sub>3</sub> nanoflakes</b>              | 1M KOH                                  | -1.2-0.2      | 169.2 mF cm <sup>-2</sup> at 1 mA cm <sup>-2</sup><br>61 mF cm <sup>-2</sup> at 5 mA cm <sup>-2</sup>     | <i>Ceram. Int.</i> <b>2018</b> , 44, 10635–10645                |
| <b>Fe<sub>2</sub>O<sub>3</sub>-P<br/>nanorods/CC</b>       | 1M Na <sub>2</sub> SO <sub>4</sub>      | -0.8-0        | 340 mF cm <sup>-2</sup> at 1 mA cm <sup>-2</sup><br>112 mF cm <sup>-2</sup> at 20 mA cm <sup>-2</sup>     | <i>Nano Energy</i> <b>2018</b> , 49, 155–162                    |
| <b>α-Fe<sub>2</sub>O<sub>3</sub><br/>nanoarrays/CC</b>     | 1M Na <sub>2</sub> SO <sub>4</sub>      | -0.8-0        | 207 mF cm <sup>-2</sup> at 1 mA cm <sup>-2</sup><br>120.8 mF cm <sup>-2</sup> at 6 mA cm <sup>-2</sup>    | <i>Angew. Chem. Int. Ed.</i> <b>2017</b> , 56, 1105–1110        |
| <b>C@Fe<sub>3</sub>O<sub>4</sub><br/>nanosheets</b>        | 1M LiCl                                 | -1-0          | 127 mF cm <sup>-2</sup> at 1 mA cm <sup>-2</sup><br>60.74 mF cm <sup>-2</sup> at 8 mA cm <sup>-2</sup>    | <i>J. Mater. Chem. A</i> <b>2016</b> 4, 14877–14883             |
| <b>α-Fe<sub>2</sub>O<sub>3</sub> nanowires</b>             | 1 M Na <sub>2</sub> SO <sub>4</sub>     | -0.8-0        | 103 mF cm <sup>-2</sup> at 0.5 mA cm <sup>-2</sup><br>26.5 mF cm <sup>-2</sup> at 5.7 mA cm <sup>-2</sup> | <i>ACS Appl. Mater. Interfaces</i> <b>2015</b> , 7, 14843–14850 |
| <b>Fe<sub>2</sub>O<sub>3</sub> nanotubes</b>               | 5 M LiCl                                | -0.8-0        | 180.4 mF cm <sup>-2</sup> at 1 mA cm <sup>-2</sup><br>119.9 mF cm <sup>-2</sup> at 10 mA cm <sup>-2</sup> | <i>Nano Lett.</i> <b>2014</b> , 14, 731–736                     |
